# Supplementary material for: Future requirements for and supply of ophthalmologists for an aging population in Singapore
Source: Springer Nature journal article supplement (doi:10.1186/s12960-015-0085-4), 2015-11-17
Supplement: MOESM1 [file 9765844]

# Ophthalmologists

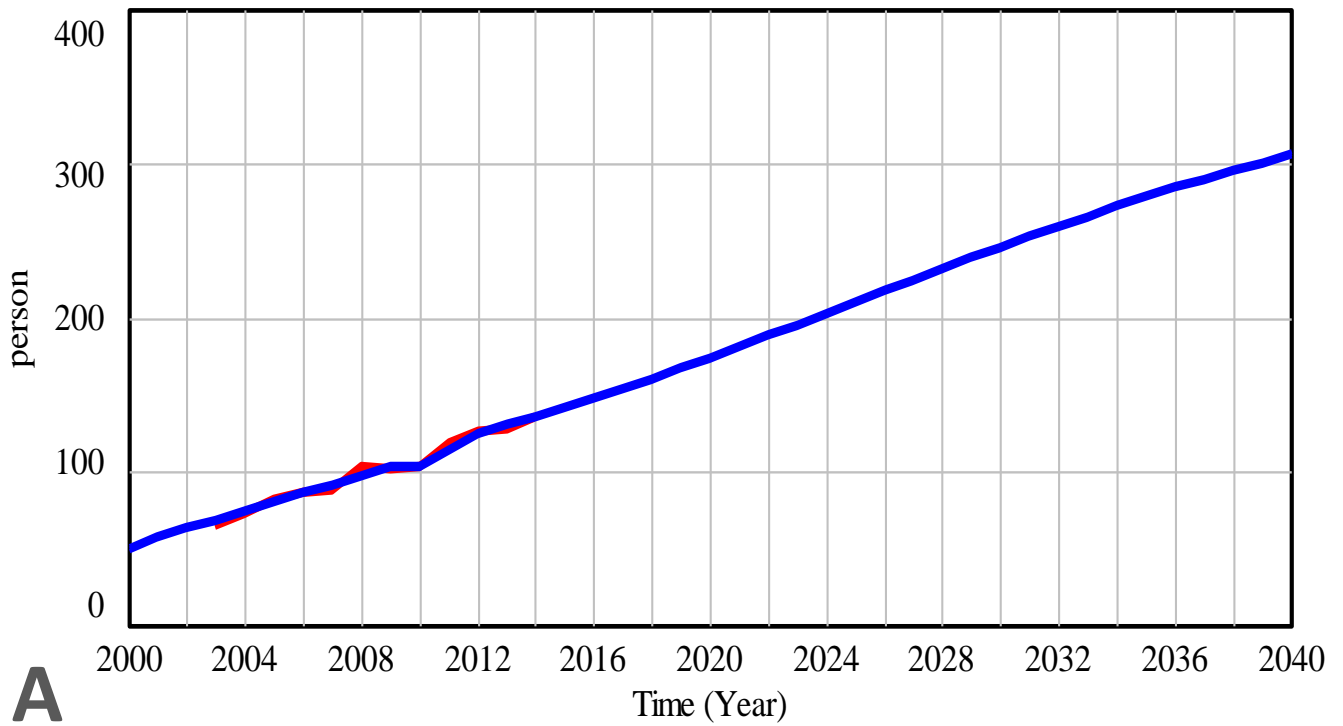

**A**

simulation

data

# Demand for Eye Care

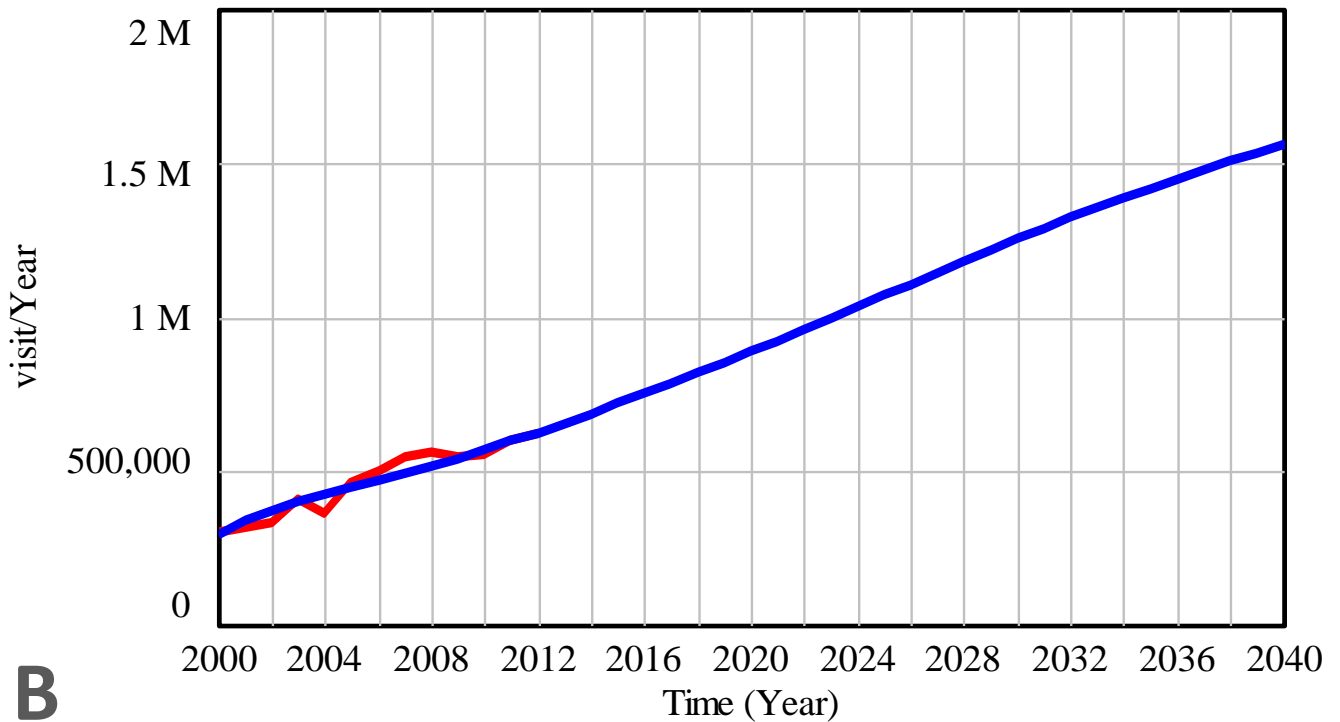

**B**

simulation

data
